# Supplementary material
Source: publisher figshare collection journal article supplement (https://acs.figshare.com/ndownloader/files/5931030)
Supplement: Supplementary file 1 [file 5931030]

## ***Supporting Information***

### **Ultrathin and Flat Layer Black Phosphorus Fabricated by Reactive Oxygen and Water Rinse**

Hyuksang Kwon,<sup>†,‡</sup> Sung Won Seo,<sup>†,‡,‡</sup> Tae Gun Kim,<sup>†,‡</sup> Eun Seong Lee,<sup>†</sup> Phung Thi  
Lanh,<sup>†,‡</sup> Sena Yang,<sup>†</sup> Sunmin Ryu,<sup>\*,§</sup> Jeong Won Kim<sup>\*,†,‡</sup>

<sup>†</sup>Korea Research Institute of Standards and Science (KRISS), Daejeon 34113, South Korea

<sup>‡</sup>Korea University of Science and Technology (UST), Daejeon 34113, South Korea

<sup>§</sup>Department of Chemistry & Division of Advanced Materials Science, Pohang University of Science and Technology (POSTECH), Pohang, Gyeongbuk 37673, South Korea

<sup>‡</sup>These authors contributed equally to this work.

<sup>\*</sup>To whom correspondence should be addressed:

E-mails: [sunryu@postech.ac.kr](mailto:sunryu@postech.ac.kr), [jeongwonk@kriss.re.kr](mailto:jeongwonk@kriss.re.kr)

#### **Contents**

A-B. Evolution of BP flakes upon ambient oxidation

C. Water rinsing-induced resistance to ambient oxidation

D. Wavelength dependence of UVO etching

E. Effects of UV irradiation in vacuum

F. Confirmation of ozone as the major etchant

G. *In situ* dissolution of phosphorus oxides

H. UVO etching of a thick BP flake probed by Raman spectroscopy

I. References

A-B. Evolution of BP flakes upon ambient oxidation

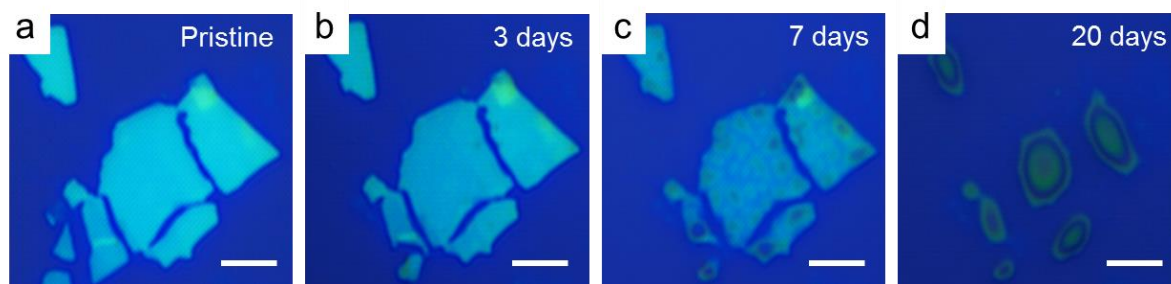

**Figure S1.** (a-d) Optical images of the BP flakes obtained during the course of ambient oxidation, corresponding to the AFM images of the same area in Figure 1a-d. Scale bars in a-d: 400 nm.

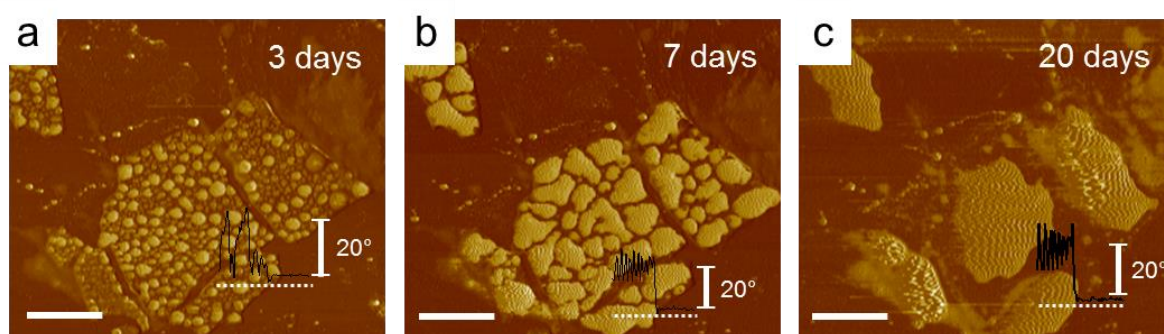

**Figure S2.** (a-c) AFM phase images of the BP flakes exposed to ambient conditions for varying times: 3 days (a), 7 days (b), and 20 days (c). Phase angle line profiles obtained along the white dotted lines are given in the AFM images. Scale bars in a-c: 400 nm.

### C. Water rinsing-induced resistance to ambient oxidation

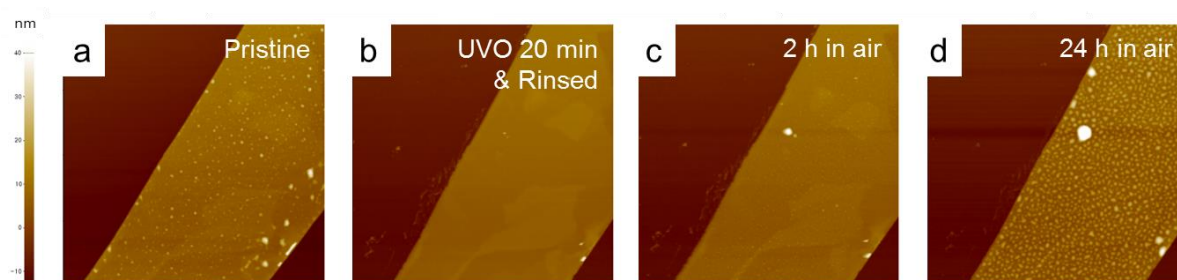

**Figure S3.** (a-d) AFM topography images of BP flakes exposed to ambient conditions for varying times: pristine (a), UVO 20 min and rinsed (b), 2 h in air (c), and 24 h in air (d). All AFM images were scanned in  $10 \times 10 \mu\text{m}^2$ .

#### D. Wavelength dependence of UVO etching

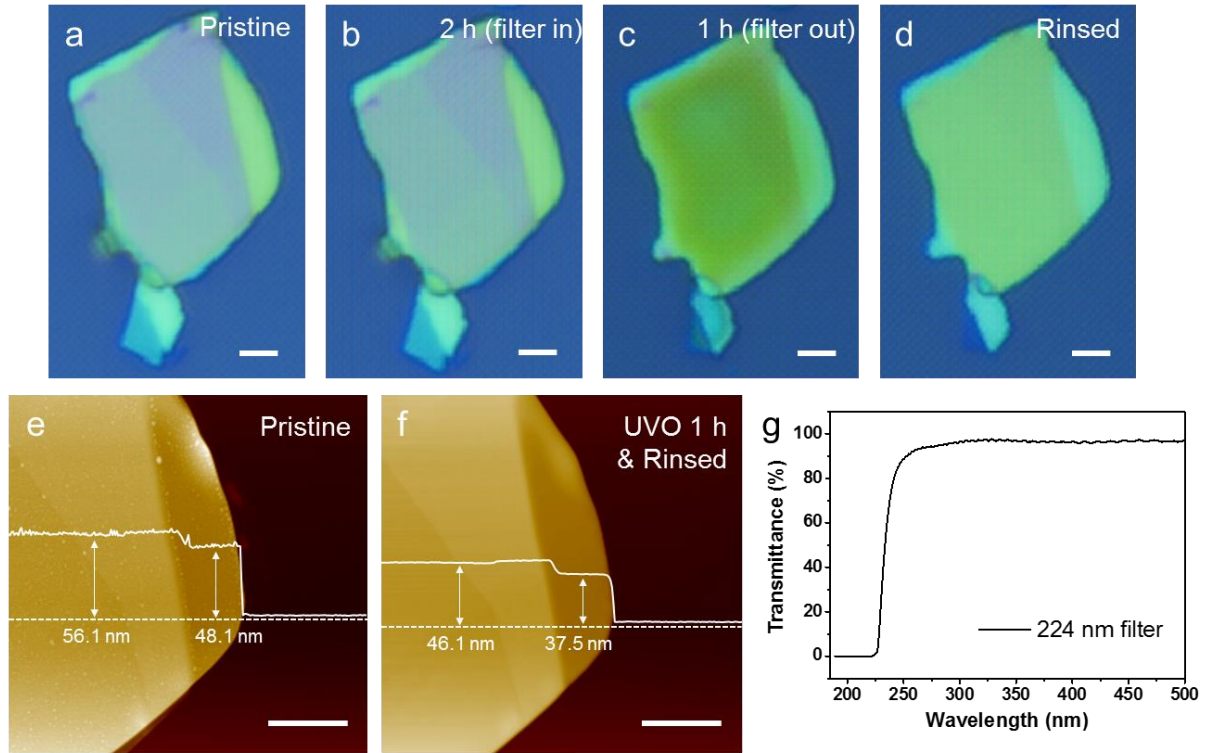

**Figure S4.** Effects of wavelength-selected UV irradiation on BP. (a-d) Optical images obtained for a BP flake during a series of UV irradiation tests: without any treatment (a), after 2 h irradiation with a long wave pass filter ( $\lambda_{\text{threshold}} = 224$  nm) inserted in the beam path (b), after 1 h irradiation without the filter (c) and after rinsing with DI water (d). (e and f) AFM height images obtained for the pristine (e) and UVO and rinsed (f) sample. The height line profiles were obtained from the dashed lines. Scale bars in a-f: 2  $\mu\text{m}$ . (g) Optical transmission spectrum of the filter employed in (b).

## E. Effects of UV irradiation in vacuum

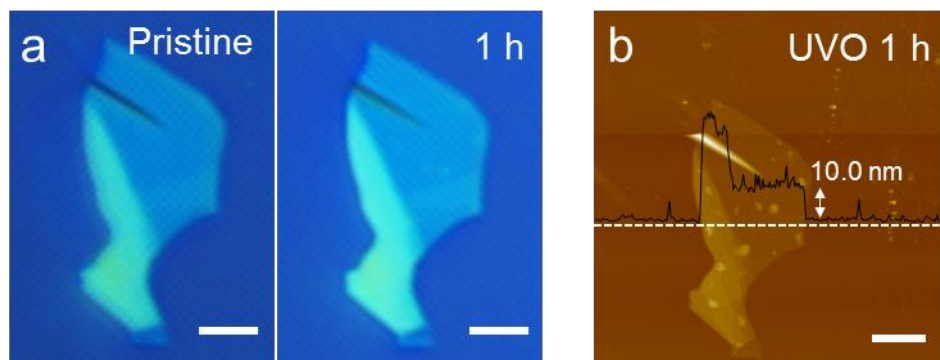

**Figure S5.** Effects of UV irradiation without O<sub>2</sub>. (a) Optical images of a BP flake before and after UV irradiation for 1 h in high vacuum ( $10^{-6}$  Torr). No significant optical contrast change was observed. (b) AFM height image obtained after the UV irradiation but without rinsing. The height line profile was obtained from the dashed line. Unlike UVO etching (Figure 2e), irradiation in vacuum does not generate large PA droplets, indicating no UV-induced etching. The small bumps are due to ambient oxidation. Scale bars in a and b: 3  $\mu$ m.

## F. Confirmation of ozone as the major etchant

To determine the contribution of the major UVO species, O atoms and O<sub>3</sub> molecules, we monitored an etching reaction of a BP flake in the dark induced by migrated UVO species. One sample was mounted with upside down in the optical cell and the backside of the substrate was exposed to the incident UV light. As shown in Figure S4, the BP flake was etched as much as the direct irradiation cases (Figure 2).

Considering the geometry of the cell, the UV-generated species need to diffuse at least 0.5 cm before reaching the BP flake shown in Figure S4. Since the association reaction of O and O<sub>2</sub> to form O<sub>3</sub> is highly efficient, the typical lifetime of O atoms in atmospheric conditions is on the order of 10<sup>-5</sup> s,<sup>1</sup> whereas that of O<sub>3</sub> is ~1 h which is limited by.<sup>2</sup> The average diffusion distance of each species can be estimated from the root-mean-squared diffusion distance,  $x_{\text{rms}} = (2Dt)^{1/2}$ , where  $D$  and  $t$  are diffusion coefficient and lifetime, respectively. As shown in the table below,  $x_{\text{rms}}(\text{O})$  and  $x_{\text{rms}}(\text{O}_3)$  are respectively two orders of magnitude shorter and longer than the required travel length of 0.5 cm. The concentration of O atoms ([O]) generated by the thermal decomposition of O<sub>3</sub> in the dark region is negligibly small,  $\sim 1.5 \times 10^{-9}$  times of [O<sub>3</sub>].<sup>2</sup> These considerations led us to conclude that the major oxidant in the UVO etching is O<sub>3</sub>.

|                      | <b>D (cm<sup>2</sup>/s)*</b> | <b>t (s)</b>       | <b><math>x_{\text{rms}}</math> (cm)</b> |
|----------------------|------------------------------|--------------------|-----------------------------------------|
| <b>O</b>             | (0.49)**                     | 1x10 <sup>-5</sup> | 0.0031                                  |
| <b>O<sub>3</sub></b> | (0.15 ± 0.02) <sup>3</sup>   | 3600               | 33                                      |
| <b>O<sub>2</sub></b> | (0.176) <sup>4</sup>         | -                  | -                                       |

\*At 25 °C and 1 atm; O and O<sub>2</sub> in air; O<sub>3</sub> in O<sub>2</sub>

\*\*The diffusion coefficient of O atoms was estimated from that of O<sub>2</sub>, assuming that the collision cross section of O atom is twice smaller than that of O<sub>2</sub>.

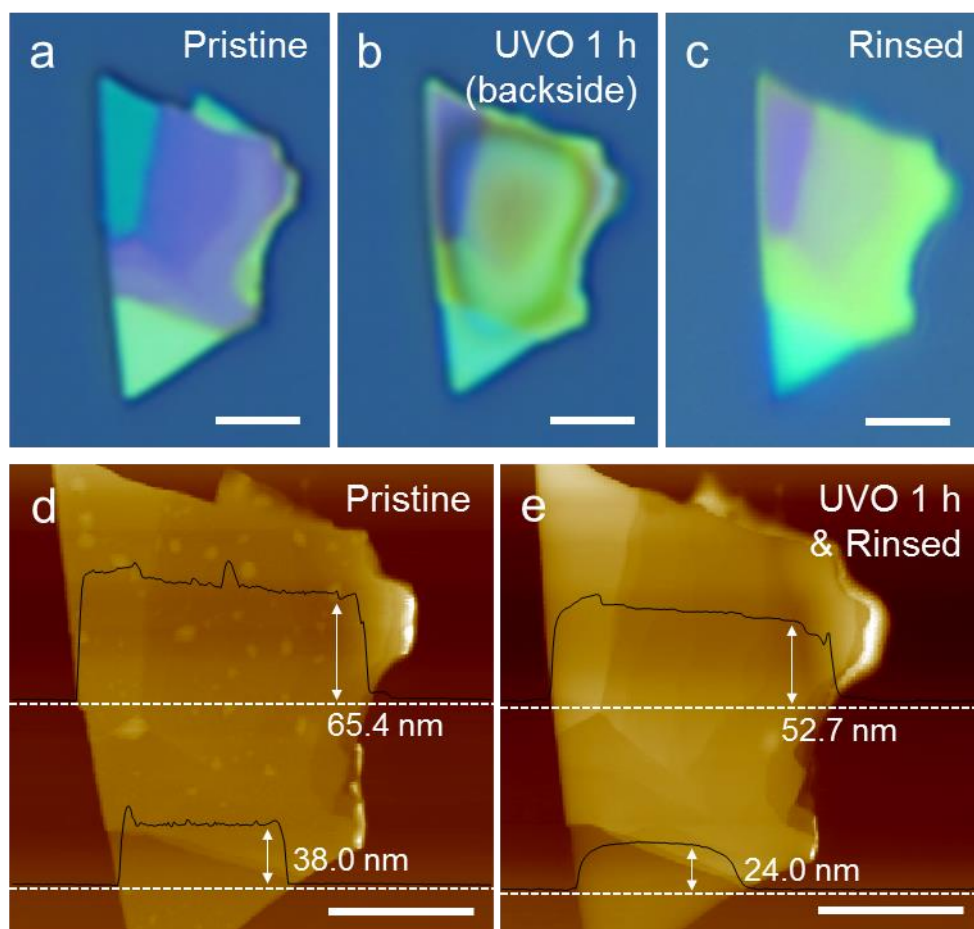

**Figure S6.** Etching of BP in the dark by migrated UVO species. (a-c) Optical images obtained for a BP flake before and after indirect UV irradiation: without any treatment (a), after 1 h irradiation on the backside of the SiO<sub>2</sub>/Si substrate to avoid direct illumination on the BP flake (b), after rinsing with DI water (c). (d and e) AFM height images obtained for the pristine (d) and UVO and rinsed (e) sample. The height line profiles were obtained from the dashed lines. Scale bars in a-e: 3 μm.



# G. *In situ* dissolution of phosphorus oxides

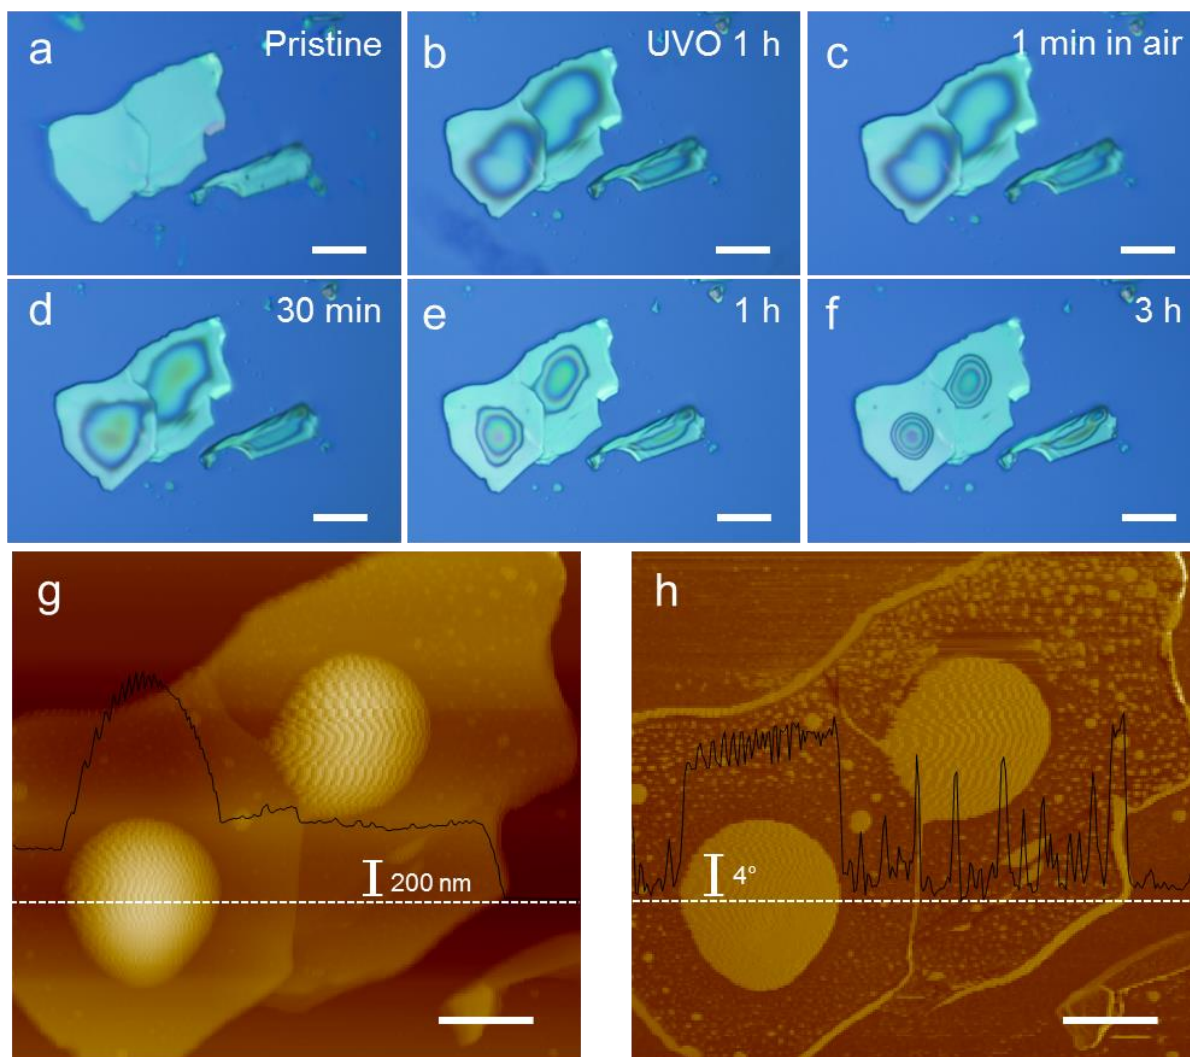

**Figure S7.** (a and b) *In situ* optical images of BP flakes in the optical cell obtained before and after UVO etching: before etching but in  $O_2$  flow (a), right after 1 h etching but in the presence of  $O_2$  flow (b). (c-f) Optical images obtained ~1 min (c), 30 min (d), 1 h (e) and 3 h (f) after the optical cell was opened to the ambient air. (g and h) AFM height (g) and phase (h) images obtained after f. Scale bars in a-f and g-h, respectively: 10  $\mu m$  and 5  $\mu m$ . The contrast change localized at the center of the flakes (b) reveals that UVO-generated phosphorus oxides possibly dissolved into phosphoric acid droplets (g and h) by absorbing residual moisture contained in  $O_2$  gas (99.995%) flow. Assuming 1 ppm ( $\sim 10^{-3}$  Torr) water impurity in the  $O_2$  gas, an exposure for 1 h would correspond to  $3.6 \times 10^6$  Langmuir, which is enough to form an  $\sim 10^6$  nm thick water film on the substrate with a sticking probability of unity.



## H. UVO etching of a thick BP flake probed by Raman spectroscopy

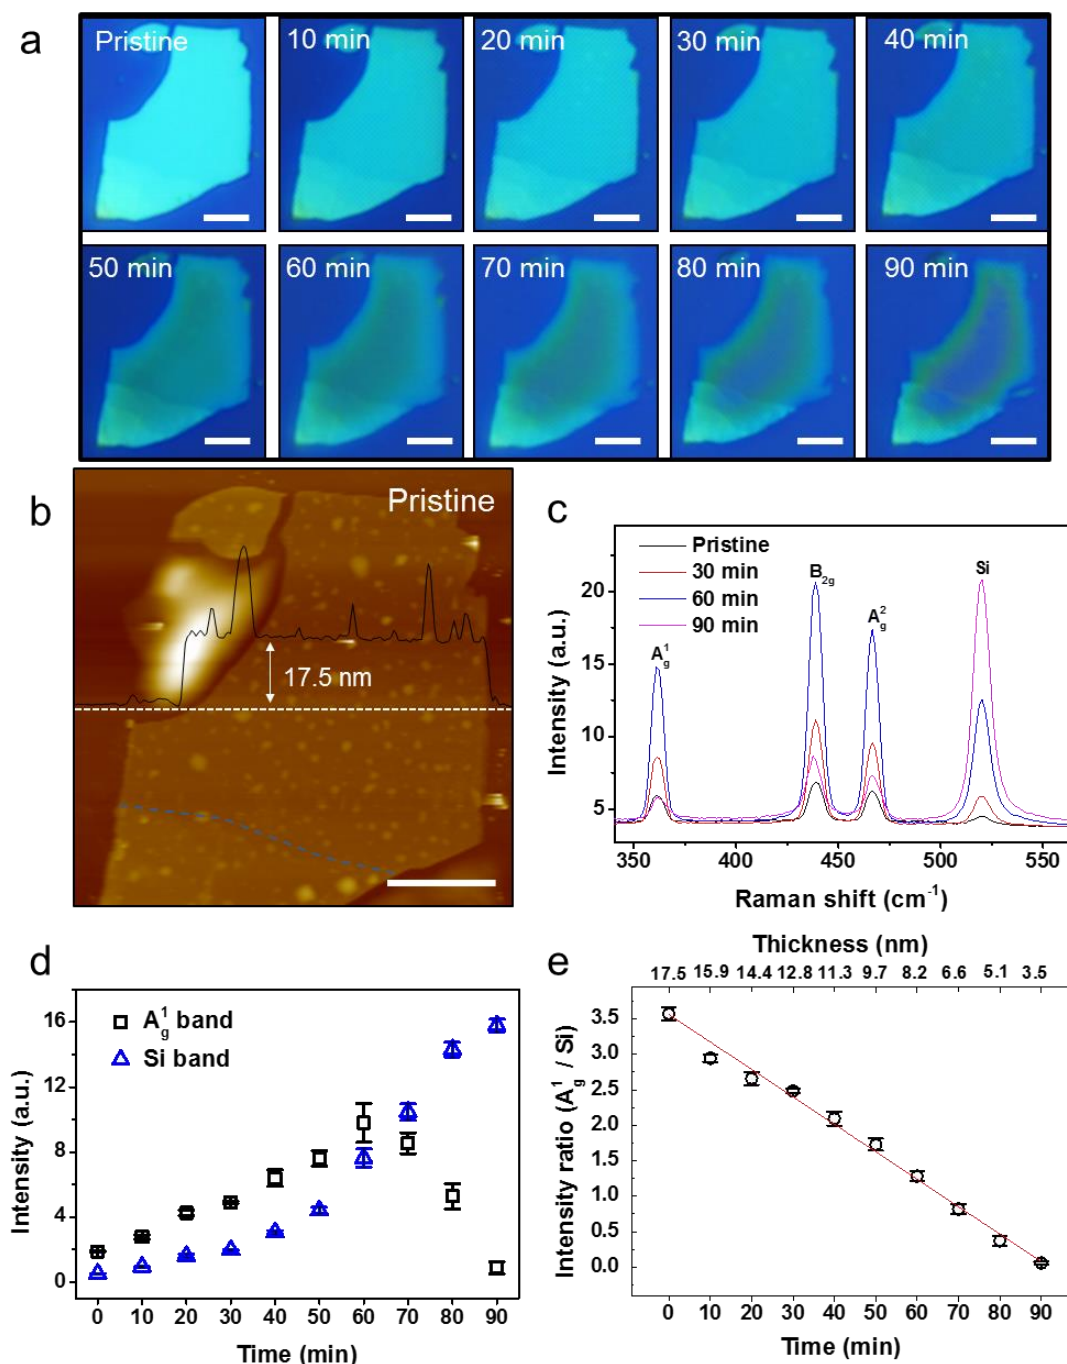

**Figure S8.** Raman spectroscopy-assisted stepwise UVO etching of a thick BP flake. (a) Optical images of the BP flake obtained in a series of UVO etching reactions. As the accumulated etching time indicated in each image increased, the optical contrast of the BP

flake decreased. (b) AFM image of the pristine BP flake. The height line profile along the dashed line shows that the flake is 17.5 nm thick. Scale bars in a and b: 4  $\mu\text{m}$ . (c) Raman spectra of the BP flake for varying etching times. (d) Peak intensities of the  $A_g^1$  and Si (520  $\text{cm}^{-1}$ ) peaks given as a function of etching time. (e) Intensity ratio of  $A_g^1/\text{Si}$  given as a function of etching time. Etching rate: 10 nm/h (pristine 17.5 nm, 3.5 nm 90 min, of which AFM height is 3.5 nm).

## I. References

- S1. Ozone Generation. In *Van Nostrand's Scientific Encyclopedia*; John Wiley & Sons, Inc., 2007.
- S2. Fridman, A., *Plasma Chemistry*. Cambridge University Press, 2008.
- S3. Massman, W. J., A Review of the Molecular Diffusivities of  $\text{H}_2\text{O}$ ,  $\text{CO}_2$ ,  $\text{CH}_4$ ,  $\text{CO}$ ,  $\text{O}_3$ ,  $\text{SO}_2$ ,  $\text{NH}_3$ ,  $\text{N}_2\text{O}$ ,  $\text{NO}$ , and  $\text{NO}_2$  in air,  $\text{O}_2$  and  $\text{N}_2$  near STP. *Atmos. Environ.* **1998**, 32, 1111-1127.
- S4. Cussler, E. L., *Diffusion: Mass Transfer in Fluid Systems*. Cambridge University Press, 1997.
